# Supplementary material for: A realistic human head phantom for electromagnetic detection of brain diseases
Source: PeerJ. 2025 Jan 29;13:e18868. doi: 10.7717/peerj.18868 (PMC11786711; doi:10.7717/peerj.18868)
Supplement: Supplemental Information 1 [file peerj-13-18868-s001.xlsx]

## Sheet: Sheet1
60.561	0.41586	61.0175	0.4827		-0.4565	-0.00753785		-0.06684	-0.160727
51.565	0.31266	50.5408	0.3145		1.0242	0.0198623		-0.00184	-0.00588499
38.072	0.2705	37.7616	0.2413		0.3104	0.00815297		0.0292	0.107948
68.093	0.56126	67.4018	0.594		0.6912	0.0101508		-0.03274	-0.058333
47.929	0.43783	46.274	0.4065		1.655	0.0345302		0.03133	0.0715575
45.109	0.31884	44.9933	0.3365		0.1157	0.0025649		-0.01766	-0.0553883
31.8	0.3085	30.8113	0.2934		0.9887	0.0310912		0.0151	0.0489465
